# Supplementary material for: Organocatalyzed Skeletal Editing of Unstrained Rings via Wolff-type Rearrangement: Modular Synthesis of BN- Isosteres and [1,2]- Azaborines
Source: Research Square preprint supplement (doi:10.21203/rs.3.rs-5055197/v1), 2024-10-16

## checkCIF/PLATON report

Structure factors have been supplied for datablock(s) Compound-3c

THIS REPORT IS FOR GUIDANCE ONLY. IF USED AS PART OF A REVIEW PROCEDURE FOR PUBLICATION, IT SHOULD NOT REPLACE THE EXPERTISE OF AN EXPERIENCED CRYSTALLOGRAPHIC REFEREE.

No syntax errors found. CIF dictionary Interpreting this report

### Datablock: Compound-3c

|                 |                |                    |             |
|-----------------|----------------|--------------------|-------------|
| Bond precision: | C-C = 0.0039 Å | Wavelength=1.54184 |             |
| Cell:           | a=8.9277(3)    | b=17.2011(5)       | c=7.9491(3) |
|                 | alpha=90       | beta=107.712(4)    | gamma=90    |
| Temperature:    | 295 K          |                    |             |

|                        | Calculated     | Reported       |
|------------------------|----------------|----------------|
| Volume                 | 1162.85 (7)    | 1162.84 (7)    |
| Space group            | P 21/c         | P 21/c         |
| Hall group             | -P 2ybc        | -P 2ybc        |
| Moiety formula         | C13 H14 B N O2 | ?              |
| Sum formula            | C13 H14 B N O2 | C13 H14 B N O2 |
| Mr                     | 227.06         | 227.06         |
| Dx, g cm <sup>-3</sup> | 1.297          | 1.297          |
| Z                      | 4              | 4              |
| Mu (mm <sup>-1</sup> ) | 0.688          | 0.688          |
| F000                   | 480.0          | 480.0          |
| F000'                  | 481.42         |                |
| h, k, l <sub>max</sub> | 11, 21, 10     | 11, 21, 9      |
| Nref                   | 2468           | 2299           |
| Tmin, Tmax             | 0.976, 0.986   | 0.941, 0.986   |
| Tmin'                  | 0.940          |                |

```
Correction method= # Reported T Limits: Tmin=0.941 Tmax=0.986
AbsCorr = MULTI-SCAN
```

Data completeness= 0.932                      Theta (max)= 77.570

|                               |                                 |
|-------------------------------|---------------------------------|
| R(reflections)= 0.0633( 1822) | wR2(reflections)= 0.2096( 2299) |
| S = 1.107                     | Npar= 159                       |

---

The following ALERTS were generated. Each ALERT has the format

**test-name\_ALERT\_alert-type\_alert-level.**

Click on the hyperlinks for more details of the test.

---

### Alert level B

PLAT410\_ALERT\_2\_B Short Intra H...H Contact H1 ..H8A . 1.87 Ang.  
x,y,z = 1\_555 Check

**Author Response: The crystal diffracted weakly and so the quality of data is not very good. For that, The hydrogen atoms were included in geometrically calculated position and were refined according to the riding model.**

---

### Alert level C

PLAT241\_ALERT\_2\_C High 'MainMol' Ueq as Compared to Neighbors of C8 Check  
PLAT241\_ALERT\_2\_C High 'MainMol' Ueq as Compared to Neighbors of C10 Check  
PLAT242\_ALERT\_2\_C Low 'MainMol' Ueq as Compared to Neighbors of C9 Check  
PLAT242\_ALERT\_2\_C Low 'MainMol' Ueq as Compared to Neighbors of C12 Check  
PLAT906\_ALERT\_3\_C Large K Value in the Analysis of Variance ..... 2.950 Check  
PLAT911\_ALERT\_3\_C Missing FCF Refl Between Thmin & STh/L= 0.600 3 Report  
9 8 1, -4 19 2, 4 5 7,

---

### Alert level G

PLAT007\_ALERT\_5\_G Number of Unrefined Donor-H Atoms ..... 1 Report  
H1A  
PLAT066\_ALERT\_1\_G Predicted and Reported Tmin&Tmax Range Identical ? Check  
PLAT072\_ALERT\_2\_G SHELXL First Parameter in WGHT Unusually Large 0.11 Report  
PLAT899\_ALERT\_4\_G SHELXL-97 is Outdated and Succeeded by SHELXL 2019/3 Note  
PLAT912\_ALERT\_4\_G Missing # of FCF Reflections Above STh/L= 0.600 160 Note  
PLAT969\_ALERT\_5\_G The 'Henn et al.' R-Factor-gap value ..... 5.693 Note  
Predicted wR2: Based on SigI\*\*2 3.68 or SHELX Weight 18.93  
PLAT978\_ALERT\_2\_G Number C-C Bonds with Positive Residual Density. 1 Info  
PLAT992\_ALERT\_5\_G Repd & Actual \_reflns\_number\_gt Values Differ by 2 Check

---

- 0 **ALERT level A** = Most likely a serious problem - resolve or explain  
1 **ALERT level B** = A potentially serious problem, consider carefully  
6 **ALERT level C** = Check. Ensure it is not caused by an omission or oversight  
8 **ALERT level G** = General information/check it is not something unexpected

- 1 ALERT type 1 CIF construction/syntax error, inconsistent or missing data  
7 ALERT type 2 Indicator that the structure model may be wrong or deficient  
2 ALERT type 3 Indicator that the structure quality may be low  
2 ALERT type 4 Improvement, methodology, query or suggestion  
3 ALERT type 5 Informative message, check
- 
-

It is advisable to attempt to resolve as many as possible of the alerts in all categories. Often the minor alerts point to easily fixed oversights, errors and omissions in your CIF or refinement strategy, so attention to these fine details can be worthwhile. In order to resolve some of the more serious problems it may be necessary to carry out additional measurements or structure refinements. However, the purpose of your study may justify the reported deviations and the more serious of these should normally be commented upon in the discussion or experimental section of a paper or in the "special\_details" fields of the CIF. checkCIF was carefully designed to identify outliers and unusual parameters, but every test has its limitations and alerts that are not important in a particular case may appear. Conversely, the absence of alerts does not guarantee there are no aspects of the results needing attention. It is up to the individual to critically assess their own results and, if necessary, seek expert advice.

### **Publication of your CIF in IUCr journals**

A basic structural check has been run on your CIF. These basic checks will be run on all CIFs submitted for publication in IUCr journals (*Acta Crystallographica*, *Journal of Applied Crystallography*, *Journal of Synchrotron Radiation*); however, if you intend to submit to *Acta Crystallographica Section C* or *E* or *IUCrData*, you should make sure that full publication checks are run on the final version of your CIF prior to submission.

### **Publication of your CIF in other journals**

Please refer to the *Notes for Authors* of the relevant journal for any special instructions relating to CIF submission.

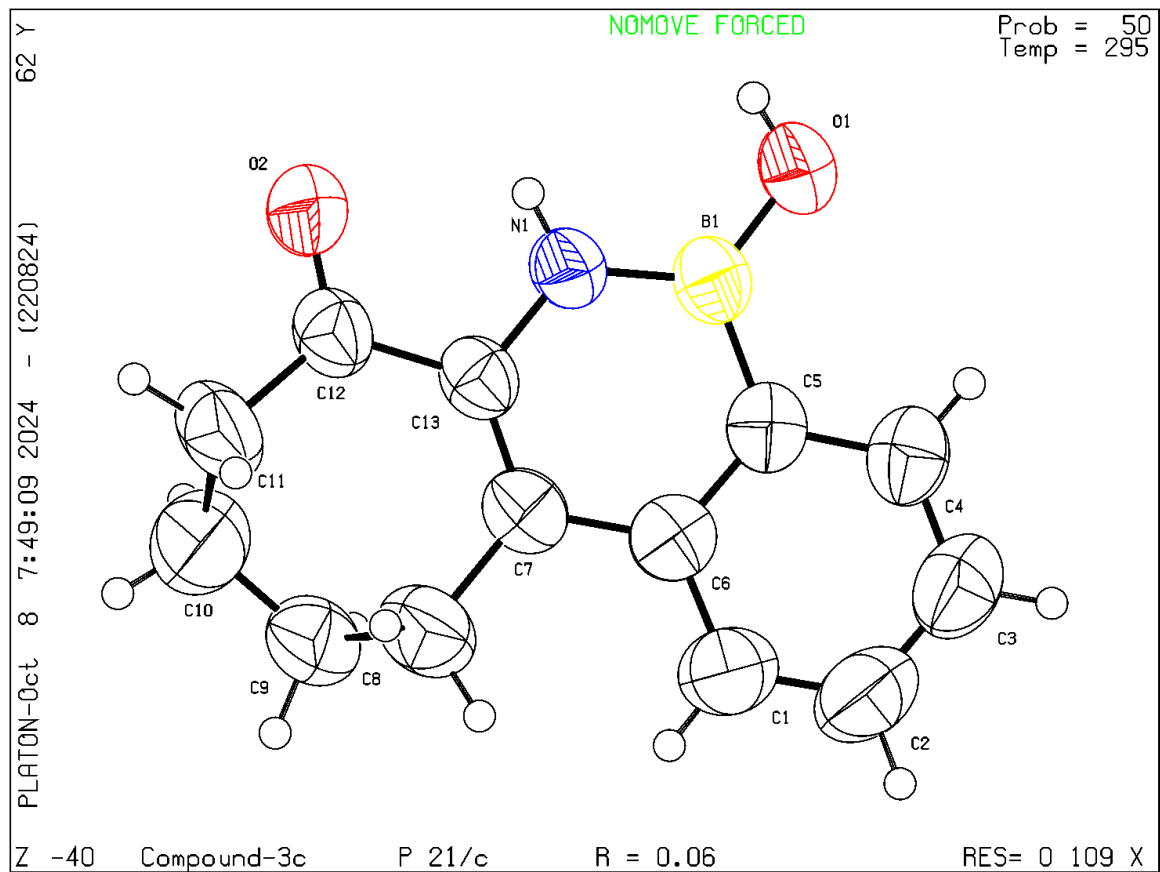

Supplement: Supplementary file 2 [file Compound 3c.pdf › Compound 3c.pdf]
