# Supplementary material for: Organocatalyzed Skeletal Editing of Unstrained Rings via Wolff-type Rearrangement: Modular Synthesis of BN- Isosteres and [1,2]- Azaborines
Source: Research Square preprint supplement (doi:10.21203/rs.3.rs-5055197/v1), 2024-10-16

Structure factors have been supplied for datablock(s) Comopound-6h

No syntax errors found. CIF dictionary Interpreting this report

|                 |                |                    |              |
|-----------------|----------------|--------------------|--------------|
| Bond precision: | C-C = 0.0044 Å | Wavelength=1.54184 |              |
| Cell:           | a=7.282 (5)    | b=14.476 (8)       | c=12.212 (7) |
|                 | alpha=90       | beta=103.047 (12)  | gamma=90     |
| Temperature:    | 293 K          |                    |              |

```
Correction method= # Reported T Limits: Tmin=0.718 Tmax=0.934
AbsCorr = MULTI-SCAN
```

```
R(reflections)= 0.0871( 1436)      wR2(reflections)=
S = 0.966                          0.2828( 2296)
Npar= 173
```

---

The following ALERTS were generated. Each ALERT has the format

**test-name\_ALERT\_alert-type\_alert-level.**

Click on the hyperlinks for more details of the test.

---

### Alert level C

DIFMN02\_ALERT\_2\_C The minimum difference density is < -0.1\*ZMAX\*0.75  
    \_refine\_diff\_density\_min given = -0.620  
    Test value = -0.600

DIFMN03\_ALERT\_1\_C The minimum difference density is < -0.1\*ZMAX\*0.75  
    The relevant atom site should be identified.

DIFMX02\_ALERT\_1\_C The maximum difference density is > 0.1\*ZMAX\*0.75  
    The relevant atom site should be identified.

PLAT084\_ALERT\_3\_C High wR2 Value (i.e. > 0.25) ..... 0.28 Report

PLAT097\_ALERT\_2\_C Large Reported Max. (Positive) Residual Density 0.65 eA-3

PLAT098\_ALERT\_2\_C Large Reported Min. (Negative) Residual Density -0.62 eA-3

PLAT199\_ALERT\_1\_C Reported \_cell\_measurement\_temperature ..... (K) 293 Check

PLAT200\_ALERT\_1\_C Reported \_diffrn\_ambient\_temperature ..... (K) 293 Check

PLAT340\_ALERT\_3\_C Low Bond Precision on C-C Bonds ..... 0.00438 Ang.

PLAT906\_ALERT\_3\_C Large K Value in the Analysis of Variance ..... 5.744 Check

PLAT911\_ALERT\_3\_C Missing FCF Refl Between Thmin & STh/L= 0.600 12 Report

          2 0 0, 1 3 0, 1 4 0, 2 1 1, 2 2 1, 2 1 2,

          0 5 2, -2 2 3, 0 4 3, -1 2 4, 2 12 9, 3 9 10,

PLAT918\_ALERT\_3\_C Reflection(s) with I(obs) much Smaller I(calc) . 6 Check

PLAT939\_ALERT\_3\_C Large Value of Not (SHELXL) Weight Optimized S . 58.16 Check

PLAT976\_ALERT\_2\_C Check Calcd Resid. Dens. 1.08Ang From Ol . -0.43 eA-3

---

### Alert level G

PLAT007\_ALERT\_5\_G Number of Unrefined Donor-H Atoms ..... 2 Report

          H1A H1B

PLAT072\_ALERT\_2\_G SHELXL First Parameter in WGHT Unusually Large 0.20 Report

PLAT899\_ALERT\_4\_G SHELXL-97 is Outdated and Succeeded by SHELXL 2019/3 Note

PLAT910\_ALERT\_3\_G Missing # of FCF Reflection(s) Below Theta(Min). 3 Note

          1 0 0, 0 2 0, 0 1 1,

PLAT912\_ALERT\_4\_G Missing # of FCF Reflections Above STh/L= 0.600 3 Note

PLAT913\_ALERT\_3\_G Missing # of Very Strong Reflections in FCF .... 2 Note

          2 0 0, 1 3 0,

PLAT969\_ALERT\_5\_G The 'Henn et al.' R-Factor-gap value ..... 4.346 Note

          Predicted wR2: Based on SigI\*\*2 6.51 or SHELX Weight 29.29

PLAT978\_ALERT\_2\_G Number C-C Bonds with Positive Residual Density. 0 Info

PLAT992\_ALERT\_5\_G Repd & Actual \_reflns\_number\_gt Values Differ by 2 Check

---

- 0 **ALERT level A** = Most likely a serious problem - resolve or explain
- 0 **ALERT level B** = A potentially serious problem, consider carefully
- 14 **ALERT level C** = Check. Ensure it is not caused by an omission or oversight
- 9 **ALERT level G** = General information/check it is not something unexpected
- 
- 4 ALERT type 1 CIF construction/syntax error, inconsistent or missing data
- 6 ALERT type 2 Indicator that the structure model may be wrong or deficient
- 8 ALERT type 3 Indicator that the structure quality may be low
- 2 ALERT type 4 Improvement, methodology, query or suggestion
- 3 ALERT type 5 Informative message, check
-

It is advisable to attempt to resolve as many as possible of the alerts in all categories. Often the minor alerts point to easily fixed oversights, errors and omissions in your CIF or refinement strategy, so attention to these fine details can be worthwhile. In order to resolve some of the more serious problems it may be necessary to carry out additional measurements or structure refinements. However, the purpose of your study may justify the reported deviations and the more serious of these should normally be commented upon in the discussion or experimental section of a paper or in the "special\_details" fields of the CIF. checkCIF was carefully designed to identify outliers and unusual parameters, but every test has its limitations and alerts that are not important in a particular case may appear. Conversely, the absence of alerts does not guarantee there are no aspects of the results needing attention. It is up to the individual to critically assess their own results and, if necessary, seek expert advice.

### **Publication of your CIF in IUCr journals**

A basic structural check has been run on your CIF. These basic checks will be run on all CIFs submitted for publication in IUCr journals (*Acta Crystallographica*, *Journal of Applied Crystallography*, *Journal of Synchrotron Radiation*); however, if you intend to submit to *Acta Crystallographica Section C* or *E* or *IUCrData*, you should make sure that full publication checks are run on the final version of your CIF prior to submission.

### **Publication of your CIF in other journals**

Please refer to the *Notes for Authors* of the relevant journal for any special instructions relating to CIF submission.

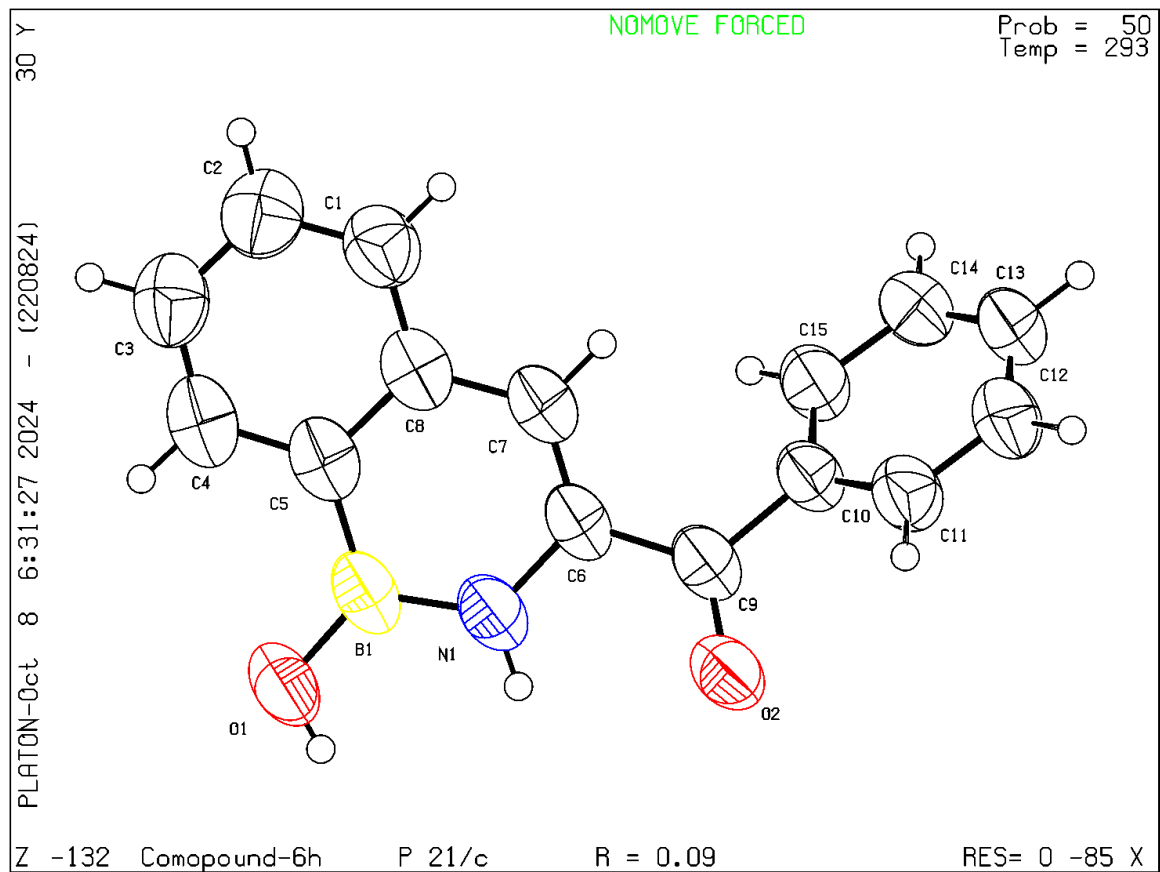

Supplement: Supplementary file 3 [file Compound 6h.pdf › Compound 6h.pdf]
